# Supplementary material for: Comparison of Mitochondrial Genomes between a Cytoplasmic Male-Sterile Line and Its Restorer Line for Identifying Candidate CMS Genes in Gossypium hirsutum
Source: MDPI journal article supplement (doi:10.3390/ijms23169198), 2022-08-16
Supplement: s1 [file s1]

Table S1 the percentage of nuclear and cytoplasmic reads in Illumina and Nanopore sequencing data

| Sequencing platform |                       | Short-reads sequencing (Illumina)     |                            |  |
|---------------------|-----------------------|---------------------------------------|----------------------------|--|
| Sample              | Map to nuclear genome | Map to cytoplasmic genome (in theory) | Map to mitochondria genome |  |
| 0-613-2R            | 95.21%                | 4.79%                                 | 2.27%                      |  |
| SI3A                | 96.42%                | 3.58%                                 | 1.42%                      |  |
| Sequencing platform |                       | Long-reads sequencing (Nanopore)      |                            |  |
| Sample              | Map to nuclear genome | Map to cytoplasmic genome (in theory) | Map to mitochondria genome |  |
| 0-613-2R            | 96.08%                | 3.92%                                 | 2.57%                      |  |
| SI3A                | 94.98%                | 5.02%                                 | 2.70%                      |  |

All proportions are calculated using reads with exact alignment ignoring supplementary and secondary alignment. Proportion of reads mapped to cytoplasmic genome is calculated 1 - proportion of reads mapped to nuclear genome.

Table S2 the primers of RT-PCR and qPCR for four specific ORFs.

| Primer name | Forward sequence (5'-3') | Reverse sequence (5'- 3') | Use                                                                      |
|-------------|--------------------------|---------------------------|--------------------------------------------------------------------------|
| qorf606a    | TGTAGATGCTACGGGTGCTT     | CTGCACGCATTCCAATACGA      | To measure mitochondrial gene expression of 0-613-2R and SI3A by qRT-PCR |
| qorf109a    | AGGGCCAGGATTCAATCTCC     | ACTTGTCGGAAATCCTCGGT      |                                                                          |
| qorf131a    | CGTGCAACCATCAAACCAGA     | GAAATACGAACAACCGCGCT      |                                                                          |
| qorf119a-2  | TGAATTTTGCTGCCAACCCA     | CCGCTTCTTCCCCTTCTCTT      |                                                                          |
| RTorf606a   | TACTTCAGGGGCACACACAA     | TGATCCCAGCGTCTCATGAA      | To assess gene expression in 0-613-2R and SI3A                           |
| RTorf109a   | TCCCGGTGAAAAGAGATCCA     | TCTCTATAGTTCCCCTTCTTGCT   |                                                                          |
| RTorf131a   | CGTGCAACCATCAAACCAGA     | ACCCAAAGCTGAACATATCCG     |                                                                          |
| RTorf119a-2 | GGTCAGTCTCGCTACCTCTT     | CCGCTTCTTCCCCTTCTCTT      |                                                                          |

Table S3 Contents of CMS line SI3A and restorer line 0-613-2R.

| Product group | Gene  | 0-613-2R        | SI3Amt1 | SI3Amt2 | SI3Amt3 | Product group | Gene     | 0-613-2R | SI3Amt1 | SI3Amt2 | SI3Amt3 |
|---------------|-------|-----------------|---------|---------|---------|---------------|----------|----------|---------|---------|---------|
| complex I     | nad3  | +               | -       | +       | -       | Ribosome      | rps7     | +        | -       | +       | -       |
|               | nad4  | +               | -       | -       | +       |               | rps10    | +        | +       | -       | -       |
|               | nad4L | +               | -       | +       | -       |               | rps12    | +        | -       | +       | -       |
|               | nad6  | +               | -       | -       | +       |               | rps14    | +        | -       | +       | -       |
|               | nad7  | +               | -       | +       | -       |               | rpL2     | +        | -       | +       | -       |
|               | nad9  | +               | -       | -       | +       |               | rpL5     | +        | -       | +       | -       |
| complex II    | sdh3  | +               | -       | -       | +       |               | rpL10    | +        | -       | +       | -       |
|               | sdh4  | +               | +       | -       | -       |               | rpL16    | +        | -       | +       | -       |
| complex III   | Cob   | +               | -       | +       | -       | tRNA          | trnK-UUU | +        | -       | +       | -       |
| complex IV    | cox1  | +               | +       | -       | -       |               | trnS-UGA | +        | -       | +       | -       |
|               | cox2  | +               | -       | +       | -       |               | trnM-CAU | +4       | +       | +2      | +       |
|               | cox3  | +               | +       | -       | -       |               | trnM-CAU | +        | +       | -       | -       |
| complex V     | atp1  | +               | +       | -       | -       |               | trnY-GUA | +        | -       | +       | -       |
|               | atp4  | +               | -       | -       | +       |               | trnN-GUU | +        | -       | +       | -       |
|               | atp6  | +               | -       | +       | -       |               | trnC-GCA | +        | -       | +       | -       |
|               | atp8  | +               | -       | +       | -       |               | trnE-UUC | +        | -       | +       | -       |
|               | atp9  | +               | -       | +       | -       |               | trnH-GUG | +        | -       | +       | -       |
| Cytochrome C  | ccmB  | +               | -       | +       | -       |               | trnS-GCU | +2       | -       | +       | -       |
|               | ccmC  | +               | -       | -       | +       |               | trnF-GAA | +2       | -       | +       | -       |
|               | ccmFN | +               | -       | +       | -       |               | trnP-UGG | +2       | -       | +2      | -       |
|               | ccmFC | +               | +       | -       | -       |               | trnW-CCA | +2       | -       | +2      | -       |
| rRNA          | rrn5  | +2 <sup>1</sup> | +       | -       | +       |               | trnV-GAC | +        | -       | +       | -       |
|               | rrn18 | +2              | +       | -       | +       |               | trnD-GUC | +2       | -       | +       | +       |
|               | rrn26 | +2              | +       | +       | -       |               | trnS-GGA | +        | -       | +       | -       |
| Other gene    | mttB  | +               | -       | -       | +       |               | trnQ-UUG | +        | -       | -       | +       |
|               | matR  | +               | -       | +       | -       |               | trnG-GCC | +        | -       | -       | +       |
| Ribosome      | rps3  | +               | -       | +       | -       |               | trnM-UAU | +        | -       | -       | +       |
|               | rps4  | +               | -       | +       | -       |               |          |          |         |         |         |

+ denotes present; - denotes absent; Gene copy number is after +;

Table S4 Repeat sequences (&gt;50bp) found in restore line 0-613-2R.

| No  | Size(bp) | copy1  |        | Type            | Size(bp) | copy2  |        | Identity (%) | Difference between copies                        |
|-----|----------|--------|--------|-----------------|----------|--------|--------|--------------|--------------------------------------------------|
|     |          | Start1 | stop1  |                 |          | Start2 | stop2  |              |                                                  |
| R1  | 10151    | 206040 | 216190 | DR <sup>a</sup> | 10144    | 459853 | 469996 | 99           | copy1 8bp indel, copy2 15bp indel.               |
| R2  | 10247    | 23665  | 33911  | IR <sup>b</sup> | 10259    | 482599 | 492857 | 99           | copy1 20bp indel, 2bp mismatch, copy2 8bp indel. |
| R3  | 2211     | 117463 | 119673 | IR              | 2211     | 511704 | 513914 | 100          |                                                  |
| R4  | 2019     | 107865 | 109883 | IR              | 2019     | 521513 | 523531 | 100          |                                                  |
| R5  | 1185     | 111448 | 112632 | IR              | 1185     | 518749 | 519933 | 100          |                                                  |
| R6  | 1181     | 114321 | 115501 | IR              | 1181     | 515871 | 517051 | 100          |                                                  |
| R7  | 1095     | 112831 | 113925 | IR              | 1095     | 517459 | 518553 | 100          |                                                  |
| R8  | 786      | 109887 | 110672 | IR              | 786      | 520722 | 521507 | 100          |                                                  |
| R10 | 517      | 115975 | 116491 | IR              | 517      | 514884 | 515400 | 100          |                                                  |
| R11 | 509      | 116720 | 117228 | IR              | 509      | 514147 | 514655 | 100          |                                                  |
| R12 | 309      | 114011 | 114319 | IR              | 309      | 517060 | 517368 | 100          |                                                  |
| R15 | 257      | 207608 | 207864 | IR              | 257      | 508650 | 508906 | 100          |                                                  |
| R16 | 257      | 461418 | 461674 | IR              | 257      | 508650 | 508906 | 100          |                                                  |
| R19 | 232      | 111093 | 111324 | IR              | 232      | 520060 | 520291 | 100          |                                                  |
| R20 | 229      | 58617  | 58845  | IR              | 229      | 585876 | 586104 | 100          |                                                  |
| R21 | 229      | 116490 | 116718 | IR              | 229      | 514656 | 514884 | 100          |                                                  |
| R22 | 219      | 283381 | 283599 | IR              | 219      | 513808 | 514026 | 100          |                                                  |
| R23 | 204      | 117245 | 117448 | IR              | 204      | 513927 | 514130 | 100          |                                                  |
| R25 | 194      | 311458 | 311651 | IR              | 194      | 489100 | 489293 | 100          |                                                  |
| R26 | 192      | 115690 | 115881 | IR              | 192      | 515492 | 515683 | 100          |                                                  |
| R27 | 175      | 128668 | 128842 | IR              | 175      | 243145 | 243319 | 100          |                                                  |
| R28 | 151      | 252393 | 252543 | IR              | 151      | 311285 | 311435 | 100          |                                                  |
| R29 | 150      | 112683 | 112832 | IR              | 150      | 518553 | 518702 | 100          |                                                  |
| R30 | 144      | 110669 | 110812 | IR              | 144      | 520581 | 520724 | 100          |                                                  |
| R34 | 118      | 243284 | 243401 | IR              | 118      | 308043 | 308160 | 100          |                                                  |
| R35 | 117      | 115576 | 115692 | IR              | 117      | 515680 | 515796 | 100          |                                                  |
| R36 | 113      | 16496  | 16608  | IR              | 113      | 300055 | 300167 | 100          |                                                  |

|     |     |        |        |    |     |        |        |     |
|-----|-----|--------|--------|----|-----|--------|--------|-----|
| R37 | 107 | 27370  | 27476  | IR | 107 | 236141 | 236247 | 100 |
| R39 | 107 | 166348 | 166454 | IR | 107 | 544550 | 544656 | 100 |
| R43 | 96  | 111356 | 111451 | IR | 96  | 519931 | 520026 | 100 |
| R48 | 90  | 111273 | 111362 | IR | 90  | 458595 | 458684 | 100 |
| R49 | 86  | 111011 | 111096 | IR | 86  | 520289 | 520374 | 100 |
| R52 | 80  | 243284 | 243363 | IR | 80  | 495464 | 495543 | 100 |
| R53 | 78  | 205303 | 205380 | IR | 78  | 414550 | 414627 | 100 |
| R54 | 76  | 110888 | 110963 | IR | 76  | 520425 | 520500 | 100 |
| R55 | 71  | 50783  | 50853  | IR | 71  | 270658 | 270728 | 100 |
| R56 | 71  | 117929 | 117999 | IR | 71  | 232143 | 232213 | 100 |
| R61 | 66  | 414403 | 414468 | IR | 66  | 455624 | 455689 | 100 |
| R62 | 62  | 115883 | 115944 | IR | 62  | 515429 | 515490 | 100 |
| R64 | 61  | 300080 | 300140 | IR | 61  | 386862 | 386922 | 100 |
| R67 | 57  | 313653 | 313709 | IR | 57  | 437442 | 437498 | 100 |
| R70 | 53  | 75044  | 75096  | IR | 53  | 290150 | 290202 | 100 |
| R76 | 51  | 359851 | 359901 | IR | 51  | 456462 | 456512 | 100 |
| R77 | 50  | 171446 | 171495 | IR | 50  | 204672 | 204721 | 100 |

---

<sup>a</sup> DR: direct repeats, <sup>b</sup> IR: invert repeats

Table S5 The open reading frames (ORFs) more than 100 amino acids in 0-613-2R mitochondrial

| genome           |        |                |               |                             |
|------------------|--------|----------------|---------------|-----------------------------|
| Gene ID          | strand | mRNA start(bp) | mRNA stop(bp) | No. of transmembrane domain |
| <i>orf124a</i>   | +      | 48069          | 48443         | 0                           |
| <i>orf119a-1</i> | +      | 30788          | 31147         | 1                           |
| <i>orf111a-1</i> | -      | 14252          | 13917         | 0                           |
| <i>orf652a</i>   | +      | 118311         | 120266        | 1                           |
| <i>orf220a</i>   | -      | 115742         | 115083        | 0                           |
| <i>orf108a</i>   | -      | 117068         | 116745        | 0                           |
| <i>orf186a</i>   | +      | 206564         | 207121        | 1                           |
| <i>orf114a</i>   | +      | 318544         | 318885        | 1                           |
| <i>orf104a</i>   | +      | 315276         | 315587        | 0                           |
| <i>orf348a</i>   | -      | 353406         | 352363        | 2                           |
| <i>orf185a</i>   | +      | 398641         | 399195        | 0                           |
| <i>orf169a</i>   | +      | 353039         | 353545        | 0                           |
| <i>orf164a</i>   | +      | 398298         | 398789        | 1                           |
| <i>orf128a</i>   | +      | 427161         | 427544        | 0                           |
| <i>orf289a</i>   | -      | 495484         | 494618        | 0                           |
| <i>orf119a-2</i> | -      | 485721         | 485365        | 1                           |
| <i>orf118a</i>   | +      | 575607         | 575960        | 2                           |
| <i>orf115a</i>   | +      | 46226          | 46573         | 0                           |
| <i>orf154a</i>   | +      | 99164          | 99625         | 0                           |
| <i>orf102a</i>   | +      | 98613          | 98918         | 0                           |
| <i>orf142a</i>   | +      | 144268         | 144693        | 2                           |
| <i>orf263a</i>   | +      | 190047         | 190835        | 0                           |
| <i>orf160a</i>   | -      | 232803         | 232324        | 2                           |
| <i>orf178a</i>   | -      | 291952         | 291419        | 0                           |
| <i>orf161a</i>   | +      | 294127         | 294609        | 0                           |
| <i>orf110a</i>   | -      | 273472         | 273143        | 0                           |
| <i>orf111a-2</i> | -      | 595914         | 595582        | 0                           |
| <i>orf157a</i>   | -      | 98264          | 97794         | 1                           |
| <i>orf399a</i>   | +      | 145547         | 146743        | 10                          |
| <i>orf314a</i>   | -      | 514127         | 513186        | 3                           |

Table S6 The open reading frames (ORFs) more than 100 amino acids in SI3A mitochondrial genome

| Gene ID          | strand | mRNA start(bp) | mRNA stop(bp) | No. of transmembrane domain |
|------------------|--------|----------------|---------------|-----------------------------|
| <i>orf160a</i>   | -      | 1345           | 863           | 0                           |
| <i>orf158a</i>   | -      | 564            | 88            | 0                           |
| <i>orf162a</i>   | -      | 2411           | 1923          | 3                           |
| <i>orf121a</i>   | +      | 4220           | 4585          | 0                           |
| <i>orf119a-1</i> | -      | 37957          | 37598         | 1                           |
| <i>orf108a-1</i> | +      | 2596           | 2922          | 0                           |
| <i>orf107a-1</i> | +      | 3276           | 3599          | 0                           |
| <i>orf124a-1</i> | -      | 20595          | 20221         | 0                           |
| <i>orf129a</i>   | +      | 87904          | 88290         | 0                           |
| <i>orf120a</i>   | +      | 102539         | 102898        | 0                           |
| <i>orf109a</i>   | -      | 116574         | 116248        | 0                           |
| <i>orf119a-2</i> | -      | 197931         | 197575        | 1                           |
| <i>orf111a-1</i> | +      | 214477         | 214809        | 0                           |
| <i>orf131a</i>   | +      | 48253          | 48648         | 0                           |
| <i>orf276a</i>   | +      | 149169         | 149999        | 0                           |
| <i>orf190a</i>   | +      | 117057         | 117626        | 0                           |
| <i>orf108a-2</i> | -      | 147919         | 147596        | 0                           |
| <i>orf159a</i>   | +      | 23773          | 24252         | 2                           |
| <i>orf132a</i>   | -      | 45811          | 45413         | 1                           |
| <i>orf606a</i>   | +      | 149166         | 150998        | 1                           |
| <i>orf212a</i>   | -      | 15842          | 15204         | 0                           |
| <i>orf112a</i>   | -      | 24209          | 23871         | 0                           |
| <i>orf101a</i>   | +      | 60615          | 60917         | 0                           |
| <i>orf106a</i>   | -      | 107535         | 107218        | 0                           |
| <i>orf135a</i>   | -      | 243079         | 242675        | 0                           |
| <i>orf123a</i>   | -      | 215867         | 215499        | 2                           |
| <i>orf102a-1</i> | +      | 228084         | 228389        | 0                           |
| <i>orf102a-2</i> | -      | 225144         | 224839        | 0                           |
| <i>orf111a-2</i> | +      | 321675         | 322007        | 0                           |
| <i>orf117a</i>   | +      | 356916         | 357266        | 0                           |
| <i>orf107a-2</i> | +      | 356266         | 356586        | 0                           |

|                  |   |        |        |   |
|------------------|---|--------|--------|---|
| <i>orf124a-2</i> | - | 89479  | 89108  | 0 |
| <i>orf317a</i>   | + | 148101 | 149051 | 3 |
| <i>orf118a</i>   | + | 172377 | 172730 | 0 |
| <i>orf102a-3</i> | - | 167689 | 167384 | 0 |
| <i>orf157a</i>   | - | 195280 | 194810 | 1 |
| <i>orf382a</i>   | + | 298851 | 299999 | 9 |
| <i>orf114a</i>   | + | 6899   | 7243   | 1 |

---
